# Supplementary material for: Association of Coffee and Tea Intake with Bone Mineral Density and Hip Fracture: A Meta-Analysis
Source: MDPI journal article supplement (doi:10.3390/medicina59061177), 2023-06-20
Supplement: s1 [file s1]

## *Supplementary Material*

# **Association of Coffee and Tea Intake with Bone Mineral Density and Hip Fracture: A Meta-analysis**

Chun-Ching Chen<sup>1, †</sup>, Yu-Ming Shen<sup>2, †</sup>, Siou-Bi Li<sup>3, †</sup>, Shu-Wei Huang<sup>4</sup>, Yi-Jie Kuo<sup>5</sup> and Yu-Pin Chen<sup>6, \*</sup>

\* Correspondence: Yu-Pin Chen: 99231@w.tmu.edu.tw

## **1 Supplementary Figures and Tables**

### **1.1 Supplementary Figures**

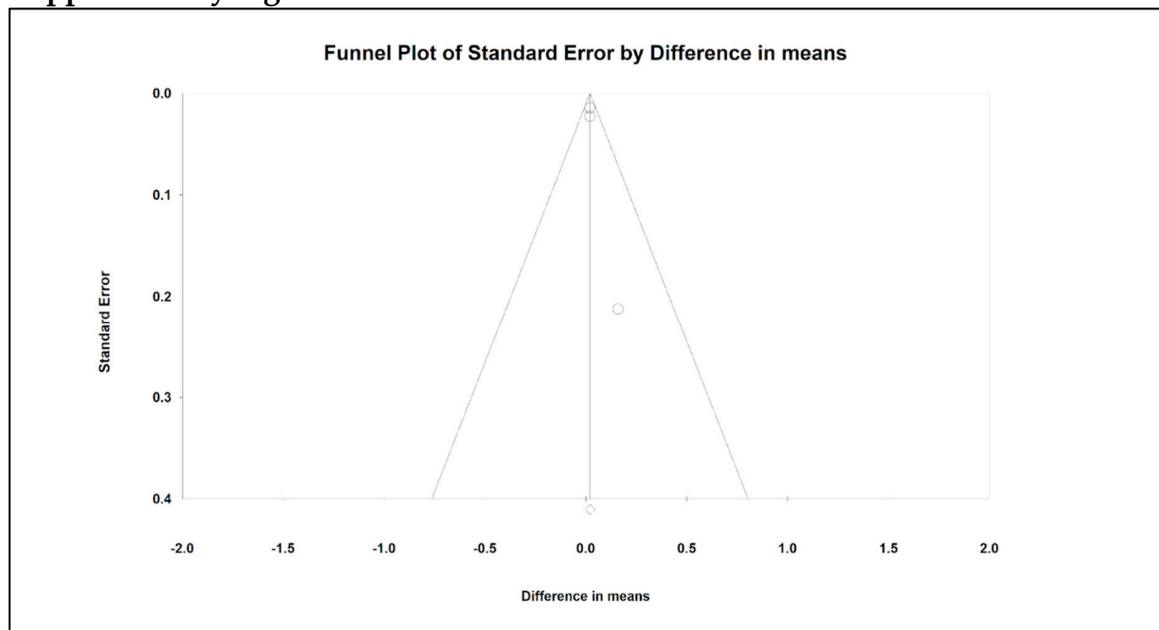

(A)

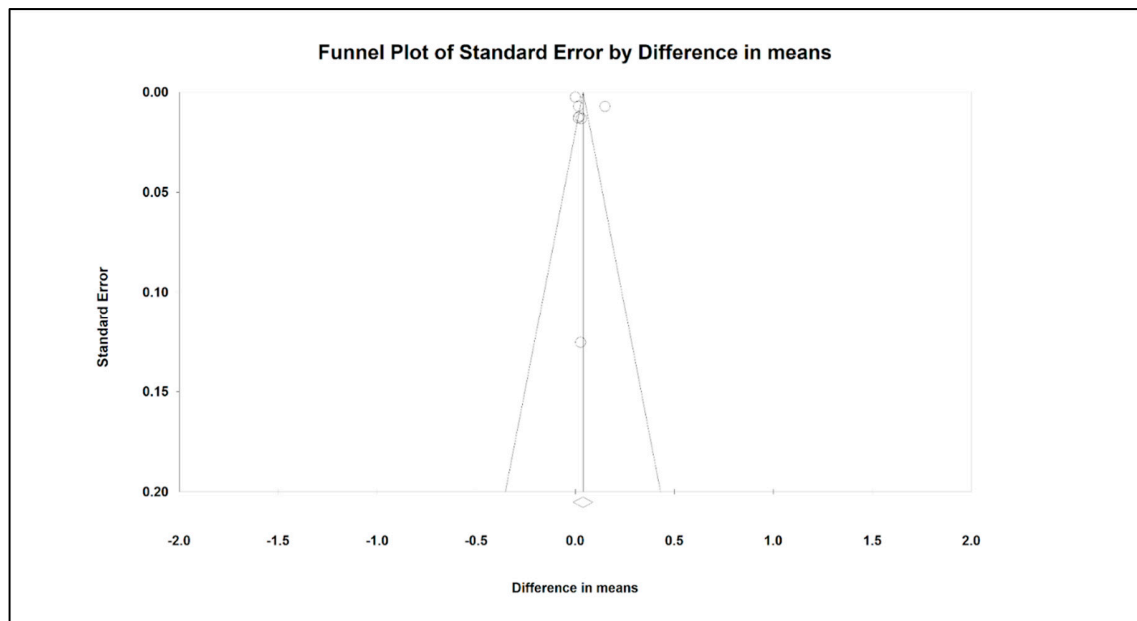

(B)

**Figure S1.** The funnel plots of the effect of coffee/tea consumption on BMD in the whole body. (A) coffee (B) tea

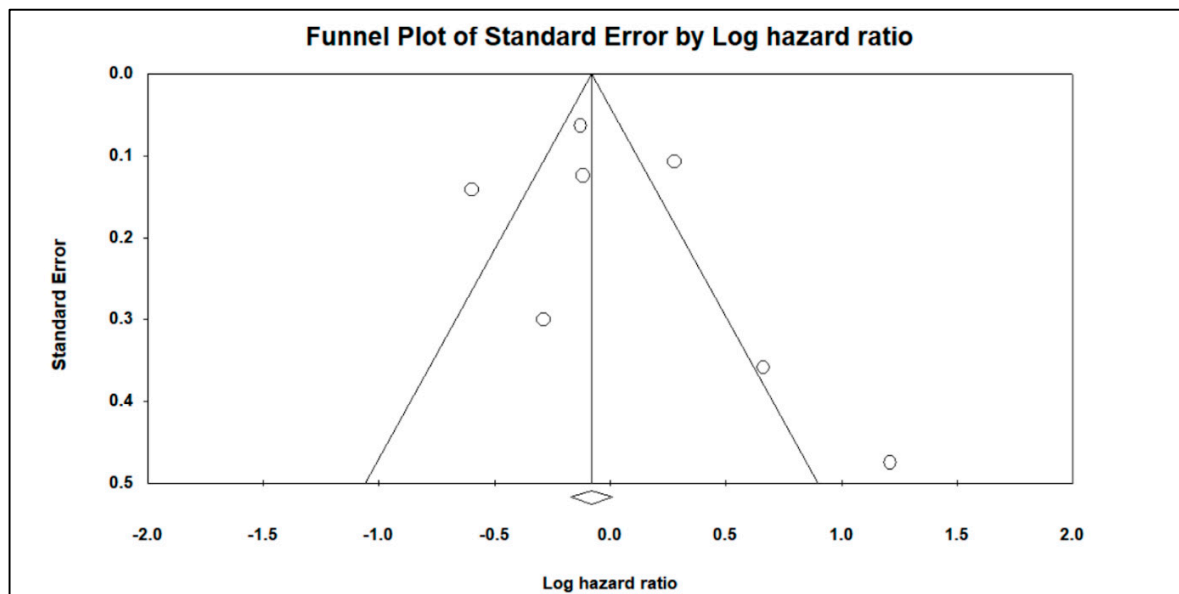

(A)

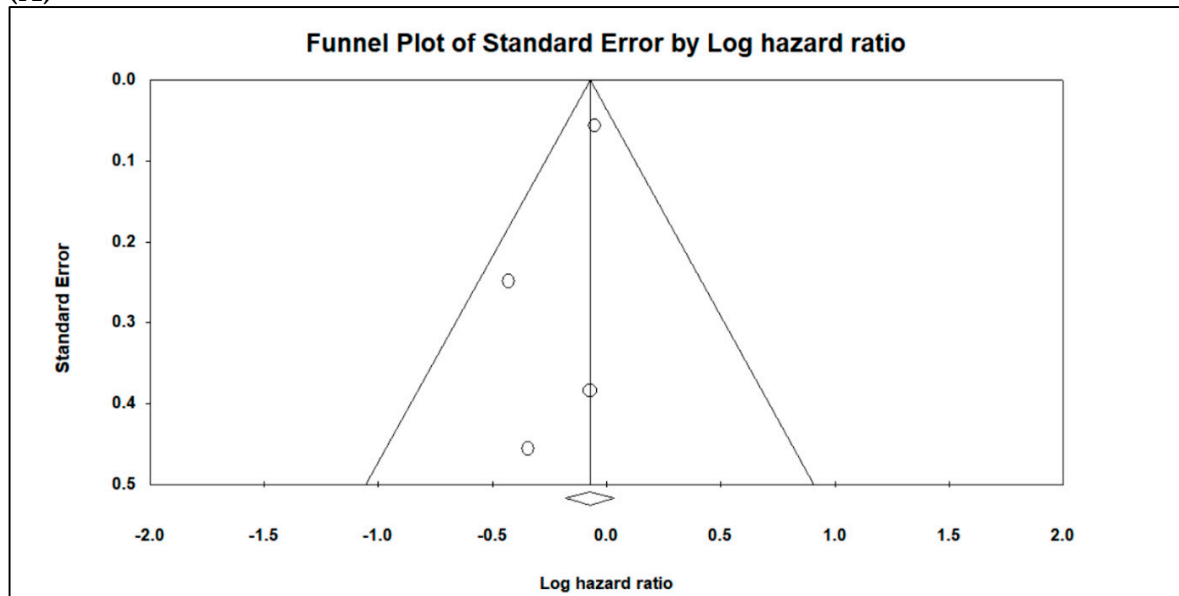

(B)

**Figure S2.** The funnel plots of the effect of coffee/tea consumption on risk of hip fracture.

(A) coffee (B) tea

## 1.2 Supplementary tables

### 1.2.1 Table S1a, S1b. MeSH searching text

coffee

|                                                                                                               |
|---------------------------------------------------------------------------------------------------------------|
| Pubmed                                                                                                        |
| ((("Bone Density"[Mesh]) OR "Hip Fractures"[Mesh]) AND "Coffee"[Mesh]                                         |
| ((("Bone Density"[Mesh]) OR "Fractures, Bone"[Mesh]) AND "Coffee"[Mesh]                                       |
| Embase                                                                                                        |
| ('bone density'/exp OR 'bone density' OR 'fracture'/exp OR 'fracture') AND ('coffee'/exp OR 'coffee')         |
| ('bone density'/exp OR 'bone density' OR 'hip fracture'/exp OR 'hip fracture') AND ('coffee'/exp OR 'coffee') |

Tea

|                                                                                                         |
|---------------------------------------------------------------------------------------------------------|
| Pubmed                                                                                                  |
| ((("Bone Density"[Mesh]) OR "Hip Fractures"[Mesh]) AND "tea"[Mesh]                                      |
| ((("Bone Density"[Mesh]) OR "Fractures, Bone"[Mesh]) AND "tea"[Mesh]                                    |
| Embase                                                                                                  |
| ('bone density'/exp OR 'bone density' OR 'fracture'/exp OR 'fracture') AND ('tea'/exp OR 'tea')         |
| ('bone density'/exp OR 'bone density' OR 'hip fracture'/exp OR 'hip fracture') AND ('tea'/exp OR 'tea') |

### 1.2.2 Table S2. Standardized data collection form

#### General Information

| Study Characteristics     | Review Inclusion Criteria                      | Yes/ No / Unclear | Location in text (pg & ¶/fig/table) |
|---------------------------|------------------------------------------------|-------------------|-------------------------------------|
| Type of study             | Controlled before-after study                  |                   |                                     |
|                           | Contemporaneous data collection                |                   |                                     |
|                           | At least 2 intervention and 2 control clusters | ...               |                                     |
|                           | Other design (specify):                        |                   |                                     |
|                           |                                                | ...               |                                     |
| Participants              |                                                | ...               |                                     |
| Types of intervention     |                                                | ...               |                                     |
| Types of outcome measures |                                                | ...               |                                     |
| Decision: ...             |                                                |                   |                                     |
| Reason for exclusion      |                                                |                   |                                     |
| Notes:                    |                                                |                   |                                     |

#### Population and setting

## Supplementary Material

|                                         | Description | Location in text<br><br>(pg & ¶/fig/table) |
|-----------------------------------------|-------------|--------------------------------------------|
| Population description                  |             |                                            |
| Setting                                 |             |                                            |
| Inclusion criteria                      |             |                                            |
| Exclusion criteria                      |             |                                            |
| Method/s of recruitment of participants |             |                                            |
| Notes:                                  |             |                                            |

## Methods

|                    | Descriptions as stated in report/paper | Location in text<br><br>(pg & ¶/fig/table) |
|--------------------|----------------------------------------|--------------------------------------------|
| Aim of study       |                                        |                                            |
| Design             |                                        |                                            |
| Unit of allocation |                                        |                                            |
| Start date         |                                        |                                            |
| End date           |                                        |                                            |

|                           |  |  |
|---------------------------|--|--|
| Duration of participation |  |  |
| Notes:                    |  |  |

### Participants

|                                  | Description as stated in report/paper | Location in text<br><br>(pg & ¶/fig/table) |
|----------------------------------|---------------------------------------|--------------------------------------------|
| Total no.                        |                                       |                                            |
| Baseline imbalances              |                                       |                                            |
| Withdrawals and exclusions       |                                       |                                            |
| Age                              |                                       |                                            |
| Sex                              |                                       |                                            |
| Severity of illness              |                                       |                                            |
| Co-morbidities                   |                                       |                                            |
| Other treatment received         |                                       |                                            |
| Other relevant sociodemographics |                                       |                                            |
| Subgroups measured               |                                       |                                            |
| Subgroups reported               |                                       |                                            |
| Notes:                           |                                       |                                            |

## Intervention groups

## Intervention Group 1

|                                                 | Description as stated in report/paper | Location in text<br><br>(pg & ¶/fig/table) |
|-------------------------------------------------|---------------------------------------|--------------------------------------------|
| Group name                                      |                                       |                                            |
| No.                                             |                                       |                                            |
| Description                                     |                                       |                                            |
| Duration of treatment period                    |                                       |                                            |
| Timing                                          |                                       |                                            |
| Delivery                                        |                                       |                                            |
| Providers                                       |                                       |                                            |
| Co-interventions                                |                                       |                                            |
| Economic variables                              |                                       |                                            |
| Resource requirements to replicate intervention |                                       |                                            |
| Notes:                                          |                                       |                                            |

## Outcomes



|                                | Description as stated in report/paper |  | Location in text<br><br>(pg & ¶/fig/table) |
|--------------------------------|---------------------------------------|--|--------------------------------------------|
| Outcome name                   |                                       |  |                                            |
| Time points measured           |                                       |  |                                            |
| Time points reported           |                                       |  |                                            |
| Outcome definition             |                                       |  |                                            |
| Person measuring/<br>reporting |                                       |  |                                            |
| Scales: upper and lower limits |                                       |  |                                            |
| Is outcome/tool validated?     | ...<br>Yes/No/Unclear                 |  |                                            |
| Imputation of missing data     |                                       |  |                                            |
| Assumed risk estimate          |                                       |  |                                            |
| Notes:                         |                                       |  |                                            |

## Results

|            | Description as stated in report/paper |  | Location in text<br><br>(pg & ¶/fig/table) |
|------------|---------------------------------------|--|--------------------------------------------|
| Comparison |                                       |  |                                            |

|                                                     |                                       |                        |                        |                        |                                            |
|-----------------------------------------------------|---------------------------------------|------------------------|------------------------|------------------------|--------------------------------------------|
|                                                     | Description as stated in report/paper |                        |                        |                        | Location in text<br><br>(pg & ¶/fig/table) |
| Outcome                                             |                                       |                        |                        |                        |                                            |
| Subgroup                                            |                                       |                        |                        |                        |                                            |
| Timepoint                                           |                                       |                        |                        |                        |                                            |
| Post-intervention or change from baseline?          |                                       |                        |                        |                        |                                            |
| Results                                             | Intervention result                   | SD (or other variance) | Control result         | SD (or other variance) |                                            |
|                                                     |                                       |                        |                        |                        |                                            |
|                                                     | Overall results                       |                        | SE (or other variance) |                        |                                            |
|                                                     |                                       |                        |                        |                        |                                            |
| No. participants                                    | Intervention                          |                        | Control                |                        |                                            |
|                                                     |                                       |                        |                        |                        |                                            |
| No. missing participants and reasons                |                                       |                        |                        |                        |                                            |
| No. participants moved from other group and reasons |                                       |                        |                        |                        |                                            |
| Any other results reported                          |                                       |                        |                        |                        |                                            |

|                                                               |                                       |                                            |
|---------------------------------------------------------------|---------------------------------------|--------------------------------------------|
|                                                               | Description as stated in report/paper | Location in text<br><br>(pg & ¶/fig/table) |
| Unit of analysis                                              |                                       |                                            |
| Statistical methods used and appropriateness of these methods |                                       |                                            |

Data organization of BMD:

### 1.2.3 Table S3. BMD Excluded studies and reasons

| Reasons for exclusion:                                                                                                                         | Amount | Reference No. |
|------------------------------------------------------------------------------------------------------------------------------------------------|--------|---------------|
| Only abstract available or cannot gain the full content of study                                                                               | 5      | 1–5           |
| Insufficient data for analysis                                                                                                                 | 19     | 6–24          |
| BMD measurement not using DXA                                                                                                                  | 10     | 25–34         |
| Grouping mismatching criteria(no exact grouping based on different levels of coffee/tea consumption)                                           | 2      | 35,36         |
| Analysis data of dietary consumption only including caffeine (no discrimination between coffee/tea and other caffeinated drinks or other food) | 8      | 37–44         |
| Outcome mismatching criteria(no exact BMD data for different consumption groups)                                                               | 19     | 45–63         |
| Only including specific population                                                                                                             | 1      | 64            |

|                                                                             |   |       |
|-----------------------------------------------------------------------------|---|-------|
| Cutoff point being too inconsistent to be organized within selected studies | 3 | 65–67 |
|-----------------------------------------------------------------------------|---|-------|

Data organization of fracture:

**1.2.4 Table S4.** Fracture excluded studies and reasons

| <b>Reasons for exclusion:</b>                                                                                                                  | <b>Amount</b> | <b>Reference No.</b> |
|------------------------------------------------------------------------------------------------------------------------------------------------|---------------|----------------------|
| Insufficient data for analysis                                                                                                                 | 1             | 68                   |
| Grouping mismatching criteria(no exact grouping based on different levels of coffee/tea consumption)                                           | 4             | 69–72                |
| Analysis data of dietary consumption only including caffeine (no discrimination between coffee/tea and other caffeinated drinks or other food) | 2             | 73,74                |
| Outcome mismatching criteria(results of study without hazard ratio, cannot converted to hazard ratio, or no recording fractures of hip)        | 16            | 21,75–89             |
| Cutoff point being too inconsistent to be organized within selected studies                                                                    | 2             | 90,91                |

**1.2.5 Table S5.** Quality assessment of cohort studies using NOS

| Article              | Representa<br>tiveness of<br>the<br>exposed<br>cohort | Selec<br>tion<br>of<br>the<br>non<br>expo<br>sed<br>coho<br>rt | Ascertai<br>nment<br>of<br>exposur<br>e | Demons<br>tration<br>that<br>outcome<br>of<br>interest<br>was not<br>present<br>at start<br>of study | Compar<br>ability<br>of<br>cohorts<br>on the<br>basis of<br>the<br>design<br>or<br>analysis | Assess<br>ment<br>of<br>outco<br>me | Was follo<br>w-up<br>long<br>enou<br>gh<br>for<br>outco<br>mes<br>to<br>occur | Adeq<br>uacy<br>of<br>follo<br>w up<br>of<br>cohor<br>ts | To<br>tal<br>sc<br>or<br>e |
|----------------------|-------------------------------------------------------|----------------------------------------------------------------|-----------------------------------------|------------------------------------------------------------------------------------------------------|---------------------------------------------------------------------------------------------|-------------------------------------|-------------------------------------------------------------------------------|----------------------------------------------------------|----------------------------|
| Hallström, H. 2010   | *                                                     | *                                                              | NO                                      | NO                                                                                                   | **                                                                                          | *                                   | *                                                                             | NO                                                       | 6                          |
| Huang<br>,<br>H.2018 | *                                                     | *                                                              | *                                       | *                                                                                                    | **                                                                                          | *                                   | *                                                                             | NO                                                       | 8                          |
| Chen,<br>Z.<br>2003  | *                                                     | *                                                              | NO                                      | *                                                                                                    | **                                                                                          | *                                   | *                                                                             | *                                                        | 8                          |
| Dai,<br>Z.2018       | *                                                     | *                                                              | NO                                      | *                                                                                                    | **                                                                                          | *                                   | *                                                                             | *                                                        | 8                          |
| Hallström,<br>H.2014 | *                                                     | *                                                              | *                                       | *                                                                                                    | **                                                                                          | *                                   | *                                                                             | *                                                        | 9                          |
| Hallström,<br>H.2013 | *                                                     | *                                                              | NO                                      | NO                                                                                                   | **                                                                                          | *                                   | *                                                                             | *                                                        | 7                          |

Supplementary Material

|                                        |    |   |    |   |    |   |   |    |   |
|----------------------------------------|----|---|----|---|----|---|---|----|---|
| van -<br>Lenthe<br>, F. J.<br>2011     | *  | * | NO | * | *  | * | * | NO | 6 |
| Trimp<br>ou, P.<br>2010                | *  | * | NO | * | ** | * | * | NO | 7 |
| Meyer,<br>H. E.<br>1997                | *  | * | NO | * | *  | * | * | *  | 7 |
| Herna<br>ndez-<br>Avila,<br>M.<br>1991 | NO | * | NO | * | ** | * | * | *  | 7 |
| Myers,<br>G.<br>2015                   | *  | * | NO | * | ** | * | * | *  | 8 |

**1.2.6 Table S6.** Quality assessment of cross-sectional studies using JBI

| Article             | 1   | 2   | 3   | 4   | 5   | 6   | 7   | 8   | Total score |
|---------------------|-----|-----|-----|-----|-----|-----|-----|-----|-------------|
| Ye, Y. 2021         | YES | YES | NO  | YES | NO  | NO  | YES | YES | 5           |
| Lloyd, T. 1997      | YES | YES | NO  | YES | YES | YES | YES | YES | 7           |
| Ni, S. 2021         | YES | 8           |
| Li, J.-Y.2021       | YES | 8           |
| Wang, G. 2014       | YES | YES | NO  | YES | YES | YES | YES | YES | 7           |
| Devine, A. 2007     | YES | YES | NO  | YES | YES | YES | YES | YES | 7           |
| Hegarty, V. M. 2000 | YES | YES | NO  | YES | YES | YES | YES | YES | 7           |

## Reference

1. *The effect of smoking tobacco and drinking of alcohol and coffee on bone mineral density of healthy men 40 years of age* | Request PDF. DOI: [www.researchgate.net/publication/12096146\\_The\\_effect\\_of\\_smoking\\_tobacco\\_and\\_drinking\\_of\\_alcohol\\_and\\_coffee\\_on\\_bone\\_mineral\\_density\\_of\\_healthy\\_men\\_40\\_years\\_of\\_age](https://www.researchgate.net/publication/12096146_The_effect_of_smoking_tobacco_and_drinking_of_alcohol_and_coffee_on_bone_mineral_density_of_healthy_men_40_years_of_age) (accessed 2021-12-28).
2. Bauer, D. C.; Browner, W. S.; Cauley, J. A.; Orwoll, E. S.; Scott, J. C.; Black, D. M.; Tao, J. L.; Cummings, S. R.; Nevitt, M. C.; Genant, H. K.; Arnaud, C.; Faulkner, K.; Fox, C.; Gluer, C.; Harvey, S.; Hulley, S. B.; Palermo, L.; Seeley, D.; Steiger, P. Factors Associated with Appendicular Bone Mass in Older Women. *Ann Intern Med* **1993**, *118* (9), 657–665. DOI: [doi.org/10.7326/0003-4819-118-9-199305010-00001](https://doi.org/10.7326/0003-4819-118-9-199305010-00001).
3. Trivitayaratana, W.; Bunyaratavej, N.; Trivitayaratana, P.; Kotivongsa, K.; SuphayaAchin, K.; Chongcharoenkamol, T. The Use of Historical and Anthropometric Data as Risk Factors for Screening of Low MBMD & MCI. *JOURNAL OF THE MEDICAL ASSOCIATION OF THAILAND* **2000**, *83* (2), 129.
4. Ramel, A. Coffee Consumption, Bone Mineral Density and Fracture Risk in Icelandic Old Adults. *Osteoporosis International* **2020**, *31* (SUPPL 1), S620. DOI: [doi.org/10.1007/s00198-020-05696-3](https://doi.org/10.1007/s00198-020-05696-3).
5. Xu, L.; Han, Y.; Zhang, Y. H.; Zhang, X. Y.; Fan, C.; Huang, H. T.; Li, P.; Geng, Z. Correlation Analysis of Bone Mineral Density and Static Balance Ability in Postmenopausal Women. *Journal of Investigative Medicine* **2019**, *67*, A1. DOI: [doi.org/10.1136/jim-2019-000994.2](https://doi.org/10.1136/jim-2019-000994.2).

6. Holvik, K.; Meyer, H. E. The Association between Caffeine Intake and Forearm Bone Mineral Density in Postmenopausal Women: The Oslo Health Study. *Norsk Epidemiologi* **2011**, *13* (1). DOI: doi.org/10.5324/NJE.V13I1.326.
7. Demirbag, D.; Ozdemir, F.; Ture, M. Effects of Coffee Consumption and Smoking Habit on Bone Mineral Density. *Rheumatol Int* **2006**, *26* (6), 530–535. DOI: doi.org/10.1007/S00296-005-0020-4/FIGURES/4.
8. Kapetanović, A.; Avdic, D. Influence of Coffee Consumption on Bone Mineral Density in Postmenopausal Women with Estrogen Deficiency in Menstrual History. *Journal of Health Sciences* **2014**, *4* (2), 105–109. DOI: doi.org/10.17532/JHSCI.2014.194.
9. Hannan, M. T.; Felson, D. T.; Dawson-Hughes, B.; Tucker, K. L.; Cupples, L. A.; Wilson, P. W. F.; Kiel, D. P. Risk Factors for Longitudinal Bone Loss in Elderly Men and Women: The Framingham Osteoporosis Study. *J Bone Miner Res* **2000**, *15* (4), 710–720. DOI: doi.org/10.1359/JBMR.2000.15.4.710.
10. Atalar, E.; Aydin, G.; Keles, I.; Inal, E.; Zog, G.; Arslan, A.; Orkun, S. Factors Affecting Bone Mineral Density in Men. *Rheumatol Int* **2009**, *29* (9), 1025–1030. DOI: doi.org/10.1007/S00296-008-0768-4.
11. Je, Y.; Jeong, S.; Park, T. Coffee Consumption Patterns in Korean Adults: The Korean National Health and Nutrition Examination Survey (2001-2011). *Asia Pac J Clin Nutr* **2014**, *23* (4), 691–702. DOI: doi.org/10.6133/APJCN.2014.23.4.11.
12. Whittle, C. R.; Woodside, J. V.; Cardwell, C. R.; McCourt, H. J.; Young, I. S.; Murray, L. J.; Boreham, C. A.; Gallagher, A. M.; Neville, C. E.; McKinley, M. C. Dietary Patterns and Bone Mineral Status in Young Adults: The Northern Ireland Young Hearts Project. *Br J Nutr* **2012**, *108* (8), 1494–1504. DOI: doi.org/10.1017/S0007114511006787.
13. Hardcastle, A. C.; Aucott, L.; Fraser, W. D.; Reid, D. M.; MacDonald, H. M. Dietary Patterns, Bone Resorption and Bone Mineral Density in Early Post-Menopausal Scottish Women. *European Journal of Clinical Nutrition* **2010**, *65* (3), 378–385. DOI: doi.org/10.1038/ejcn.2010.264.
14. Tucker, K. L.; Chen, H.; Hannan, M. T.; Adrienne Cupples, L.; Wilson, P. W. F.; Felson, D.; Kiel, D. P. Bone Mineral Density and Dietary Patterns in Older Adults: The Framingham Osteoporosis Study. *Am J Clin Nutr* **2002**, *76* (1), 245–252. DOI: doi.org/10.1093/AJCN/76.1.245.
15. Park, S. J.; Joo, S. E.; Min, H.; Park, J. K.; Kim, Y.; Kim, S. S.; Ahn, Y. Dietary Patterns and Osteoporosis Risk in Postmenopausal Korean Women. *Osong Public Health Res Perspect* **2012**, *3* (4), 199–205. DOI: doi.org/10.1016/J.PHRP.2012.10.005.
16. Hansen, M. A.; Overgaard, K.; Riis, B. J.; Christiansen, C. Potential Risk Factors for Development of Postmenopausal Osteoporosis--Examined over a 12-Year Period. *Osteoporos Int* **1991**, *1* (2), 95–102. DOI: doi.org/10.1007/BF01880450.



17. Reid, I. R.; Ames, R. W.; Evans, M. C.; Sharpe, S. J.; Gamble, G. D. Determinants of the Rate of Bone Loss in Normal Postmenopausal Women. *J Clin Endocrinol Metab* **1994**, *79* (4), 950–954. DOI: doi.org/10.1210/JCEM.79.4.7962303.
18. Vestergaard, P.; Hermann, A. P.; Gram, J.; Jensen, L. B.; Eiken, P.; Abrahamsen, B.; Brot, C.; Kolthoff, N.; Sørensen, O. H.; Beck Nielsen, H.; Pors Nielsen, S.; Charles, P.; Mosekilde, L. Evaluation of Methods for Prediction of Bone Mineral Density by Clinical and Biochemical Variables in Perimenopausal Women. *Maturitas* **2001**, *40* (3), 211–220. DOI: doi.org/10.1016/S0378-5122(01)00240-7.
19. Ilich, J. Z.; Cvijetic, S. C.; Baric, I. C.; Cecic, I.; Saric, M.; Crncevic-Orlic, Z.; Blanusa, M.; Korsic, M. Nutrition and Lifestyle in Relation to Bone Health and Body Weight in Croatian Postmenopausal Women. *Int J Food Sci Nutr* **2009**, *60* (4), 319–332. DOI: doi.org/10.1080/09637480701780724.
20. Kalem, M. N.; Kalem, Z.; Akgun, N.; Bakırarar, B. The Relationship between Postmenopausal Women's Sclerostin Levels and Their Bone Density, Age, Body Mass Index, Hormonal Status, and Smoking and Consumption of Coffee and Dairy Products. *Arch Gynecol Obstet* **2017**, *295* (3), 785–793. DOI: doi.org/10.1007/S00404-017-4288-X/TABLES/1.
21. Yuan, S.; Michaëlsson, K.; Wan, Z.; Larsson, S. C. Associations of Smoking and Alcohol and Coffee Intake with Fracture and Bone Mineral Density: A Mendelian Randomization Study. *Calcif Tissue Int* **2019**, *105* (6), 582–588. DOI: doi.org/10.1007/S00223-019-00606-0.
22. Chan, C. Y.; Subramaniam, S.; Chin, K. Y.; Ima-Nirwana, S.; Muhammad, N.; Fairus, A.; Rizal, A. M. M.; Ng, P. Y.; Aini, J. N.; Aziz, N. A.; Mohamed, N. Knowledge, Beliefs, Dietary, and Lifestyle Practices Related to Bone Health among Middle-Aged and Elderly Chinese in Klang Valley, Malaysia. *Int J Environ Res Public Health* **2019**, *16* (10). DOI: doi.org/10.3390/IJERPH16101787.
23. Dietary Pattern-Based Differences in the Associations Between Weight Control, Bone Mineral Density, and the Risk of Fracture Among Iranian Postmenopausal Women With Osteoporosis: An Application of Theory of Planned Behavior.
24. Lee, D. B.; Song, H. J.; Paek, Y. J.; Park, K. H.; Seo, Y. G.; Noh, H. M. Relationship between Regular Green Tea Intake and Osteoporosis in Korean Postmenopausal Women: A Nationwide Study. *Nutrients* **2022**, *14* (1). DOI: doi.org/10.3390/NU14010087.
25. Johansson, C.; Mellstrom, D. Coffee Drinking: A Minor Risk Factor for Bone Loss and Fractures.
26. Cauley, J. A.; Fullman, R. L.; Stone, K. L.; Zmuda, J. M.; Bauer, D. C.; Barrett-Connor, E.; Ensrud, K.; Lau, E. M. C.; Orwoll, E. S. Factors Associated with the Lumbar Spine and Proximal Femur Bone Mineral Density in Older Men. *Osteoporosis International* **2005**, *16* (12), 1525–1537. DOI: doi.org/10.1007/S00198-005-1866-8/TABLES/5.

27. Yang, P.; Zhang, X. Z.; Zhang, K.; Tang, Z. Associations between Frequency of Coffee Consumption and Osteoporosis in Chinese Postmenopausal Women. *Int J Clin Exp Med* **2015**, *8* (9), 15958.
28. Yu, Q.; Liu, Z. H.; Lei, T.; Tang, Z. Subjective Evaluation of the Frequency of Coffee Intake and Relationship to Osteoporosis in Chinese Men. *J Health Popul Nutr* **2016**, *35* (1), 24. DOI: doi.org/10.1186/S41043-016-0060-2/TABLES/5.
29. Al-Ayyadhi, N.; Refaat, L. A. E.; Ibrahim, M. M.; Elgalil, H. M. A. Screening for Bone Mineral Density and Assessment Knowledge Level of Low Peak Bone Risk Factors and Preventive Practices among Kuwaiti Future Mothers. *J Multidiscip Healthc* **2020**, *13*, 1983–1991. DOI: doi.org/10.2147/JMDH.S280261.
30. Chin, K. Y.; Low, N. Y.; Dewiputri, W. I.; Ima-Nirwanaa, S. Factors Associated with Bone Health in Malaysian Middle-Aged and Elderly Women Assessed via Quantitative Ultrasound. *Int J Environ Res Public Health* **2017**, *14* (7). DOI: doi.org/10.3390/IJERPH14070736.
31. Chang, H.-C.; Hsieh, C.-F.; Lin, Y.-C.; Manli Tantoh, D.; Kung, Y.-Y.; Lin, M.-C.; Liaw, Y.-C.; Liaw, Y.-P. Coffee Consumption Might Reduce the Risk of Osteopenia/Osteoporosis in Premenopausal Taiwanese Women. *Journal of Food and Nutrition Research* **2017**, *5* (10), 789–793. DOI: doi.org/10.12691/JFNR-5-10-10.
32. Chang, H. C.; Hsieh, C. F.; Lin, Y. C.; Tantoh, D. M.; Ko, P. C.; Kung, Y. Y.; Wang, M. C.; Hsu, S. Y.; Liaw, Y. C.; Liaw, Y. P. Does Coffee Drinking Have Beneficial Effects on Bone Health of Taiwanese Adults? A Longitudinal Study. *BMC Public Health* **2018**, *18* (1), 1–10. DOI: doi.org/10.1186/S12889-018-6168-0/TABLES/5.
33. Keskin, Y.; Çekin, M. D.; Gündüz, H.; Lüleci, N. E.; Giray, E.; Sur, H.; Akyüz, G. The Prevalence of Osteoporosis in the Thrace Region of Turkey: A Community-Based Study. *Turkiye Fiziksel Tip ve Rehabilitasyon Dergisi* **2014**, *60* (4), 335–340. DOI: doi.org/10.5152/TFTRD.2014.34033.
34. Forsmo, S.; Schei, B.; Langhammer, A.; Forsén, L. How Do Reproductive and Lifestyle Factors Influence Bone Density in Distal and Ultradistal Radius of Early Postmenopausal Women? The Nord-Trøndelag Health Survey, Norway. *Osteoporosis International* **2001**, *12*:3 **2001**, *12* (3), 222–229. DOI: doi.org/10.1007/S001980170133.
35. Berriche, O.; Chiraz, A.; Othman, R. Ben; Souheila, H.; Lahmer, I.; Wafa, C.; Sebai, I.; Sfar, H.; Mahjoub, F.; Jamoussi, H.; Journal, A. Nutritional Risk Factors for Postmenopausal Osteoporosis. *Alexandria Journal of Medicine* **2016**. DOI: doi.org/10.1016/j.ajme.2016.03.007.
36. Franceschi, S.; Schinella, D.; Bidoli, E.; Dal Maso, L.; Vecchia, C. La; Parazzini, F.; Zecchin, R. The Influence of Body Size, Smoking, and Diet on Bone Density in Pre-and Postmenopausal. *Source: Epidemiology* **1996**, *7* (4), 411–414.

37. Huitrón-Bravo, G.; Denova-Gutiérrez, E.; Talavera, J. O.; Moran-Villota, C.; Tamayo, J.; Omaña-Covarrubias, A.; Salmerón, J. Levels of Serum Estradiol and Lifestyle Factors Related with Bone Mineral Density in Premenopausal Mexican Women: A Cross-Sectional Analysis. *BMC Musculoskelet Disord* **2016**, *17* (1). DOI: doi.org/10.1186/S12891-016-1273-7.
38. Conlisk, A. J.; Galuska, D. A. Is Caffeine Associated with Bone Mineral Density in Young Adult Women? *Prev Med (Baltim)* **2000**, *31* (5), 562–568. DOI: doi.org/10.1006/PMED.2000.0742.
39. Hernández-Avila, M.; Stampfer, M. J.; Ravnika, V. A.; Willett, W. C.; Schiff, I.; Francis, M.; Longscope, C.; McKinlay, S. M. Caffeine and Other Predictors of Bone Density among Pre- and Perimenopausal Women. *Epidemiology* **1993**, *4* (2), 128–134. DOI: doi.org/10.1097/00001648-199303000-00008.
40. De França, N. A. G.; Camargo, M. B. R.; Lazaretti-Castro, M.; Peters, B. S. E.; Martini, L. A. Dietary Patterns and Bone Mineral Density in Brazilian Postmenopausal Women with Osteoporosis: A Cross-Sectional Study. *European Journal of Clinical Nutrition* **2016** *70:1* **2015**, *70* (1), 85–90. DOI: doi.org/10.1038/ejcn.2015.27.
41. Rapuri, P. B.; Gallagher, J. C.; Kinyamu, H. K.; Ryschon, K. L. Caffeine Intake Increases the Rate of Bone Loss in Elderly Women and Interacts with Vitamin D Receptor Genotypes. *Am J Clin Nutr* **2001**, *74* (5), 694–700. DOI: doi.org/10.1093/AJCN/74.5.694.
42. Lloyd, T.; Johnson-Rollings, N.; Mauger, E. A.; Cusatis, D. C.; Eggle, D. F.; Kieselhorst, K. Bone Status among Postmenopausal Women with Different Habitual Caffeine Intakes: A Longitudinal Investigation. *J Am Coll Nutr* **2000**, *19* (2), 256–261. DOI: doi.org/10.1080/07315724.2000.10718924.
43. Harris, S. S.; Dawson-Hughes, B. Caffeine and Bone Loss in Healthy Postmenopausal Women1-4. *Am J Clin Nutr* **1994**, *60*, 573–581.
44. Hirata, H.; Kitamura, K.; Saito, T.; Kobayashi, R.; Iwasaki, M.; Yoshihara, A.; Watanabe, Y.; Oshiki, R.; Nishiwaki, T.; Nakamura, K. Association between Dietary Intake and Bone Mineral Density in Japanese Postmenopausal Women: The Yokogoshi Cohort Study. *Tohoku J Exp Med* **2016**, *239* (2), 95–101. DOI: doi.org/10.1620/TJEM.239.95.
45. Hsiao, M. C.; Liu, C. Y.; Wang, C. J. Factors Associated with Low Bone Density among Women with Major Depressive Disorder. *Int J Psychiatry Med* **2012**, *44* (1), 77–90. DOI: doi.org/10.2190/PM.44.1.f.
46. Saitoglu, M.; Ardicoglu, O.; Ozgocmen, S.; Kamanli, A.; Kaya, A. Osteoporosis Risk Factors and Association with Somatotypes in Males. *Arch Med Res* **2007**, *38* (7), 746–751. DOI: doi.org/10.1016/J.ARCMED.2007.03.009.

47. Choi, E. J.; Kim, K. H.; Koh, Y. J.; Lee, J. S.; Lee, D. R.; Park, S. M. Coffee Consumption and Bone Mineral Density in Korean Premenopausal Women. *Korean J Fam Med* **2014**, *35* (1), 11–18. DOI: doi.org/10.4082/KJFM.2014.35.1.11.
48. Barger-Lux, M. J.; Heaney, R. P.; Stegman, M. R. Effects of Moderate Caffeine Intake on the Calcium Economy of Premenopausal Women. *Am J Clin Nutr* **1990**, *52* (4), 722–725. DOI: doi.org/10.1093/AJCN/52.4.722.
49. Zagórski, J. *OSTEOPOROSIS RISK FACTORS IN RURAL AND URBAN WOMEN FROM THE LUBLIN REGION OF POLAND 5DIDá6)LOLS*; 2005; Vol. 12.
50. Korpelainen, R.; Korpelainen, J.; Heikkinen, J.; Väänänen, K.; Keinänen-Kiukaanniemi, S. Lifestyle Factors Are Associated with Osteoporosis in Lean Women but Not in Normal and Overweight Women: A Population-Based Cohort Study of 1222 Women. *Osteoporosis International* **2003**, *14* (1), 34–43. DOI: doi.org/10.1007/S00198-002-1319-6.
51. Bijelic, R.; Milicevic, S.; Balaban, J. Risk Factors for Osteoporosis in Postmenopausal Women. *Medical Archives* **2017**, *71* (1), 25. DOI: doi.org/10.5455/MEDARH.2017.71.25-28.
52. Cooper, C.; Atkinson, E. J.; Wahner, H. W.; O’Fallon, W. M.; Riggs, B. L.; Judd, H. L.; Melton, L. J. Is Caffeine Consumption a Risk Factor for Osteoporosis? *Journal of Bone and Mineral Research* **1992**, *7* (4), 465–471. DOI: doi.org/10.1002/JBMR.5650070415.
53. Marci, C. D.; Viechnicki, M. B.; Greenspan, S. L. Bone Mineral Densitometry Substantially Influences Health-Related Behaviors of Postmenopausal Women. *Calcified Tissue International* **2000**, *66* (2), 113–118. DOI: doi.org/10.1007/S002230010024.
54. Kara, I. H.; Aydin, S.; Gemalmaz, A.; Aktürk, Z.; Yaman, H.; Bozdemir, N.; Kurdak, H.; Sitmapinar, K.; Sencar, I. D.; Başak, O.; Akdeniz, M.; Işildar, H.; Burgut, E.; Özcan, S.; Akça, Ü.; Dağdeviren, N.; Ungan, M. Habitual Tea Drinking and Bone Mineral Density in Postmenopausal Turkish Women: Investigation of Prevalence of Postmenopausal Osteoporosis in Turkey (IPPOT Study). <http://dx.doi.org/10.1024/0300-9831.77.6.389> **2013**, *77* (6), 389–397. DOI: doi.org/10.1024/0300-9831.77.6.389.
55. Hallström, H.; Byberg, L.; Glynn, A.; Lemming, E. W.; Wolk, A.; Michaëlsson, K. Long-Term Coffee Consumption in Relation to Fracture Risk and Bone Mineral Density in Women. *Am J Epidemiol* **2013**, *178* (6), 898–909. DOI: doi.org/10.1093/AJE/KWT062.
56. Choi, E.; Choi, K. H.; Park, S. M.; Shin, D.; Joh, H. K.; Cho, E. The Benefit of Bone Health by Drinking Coffee among Korean Postmenopausal Women: A Cross-Sectional Analysis of the Fourth & Fifth Korea National Health and Nutrition Examination Surveys. *PLoS One* **2016**, *11* (1). DOI: doi.org/10.1371/JOURNAL.PONE.0147762.

57. Alshanbari, M. F.; Alsofyani, E. M.; Almalki, D. M.; Alswat, K. A. Caffeine Effect on Bone Mineral Density: A Cross-Sectional Study. *Journal of Clinical and Diagnostic Research* **2018**, *12* (2), OC14–OC17. DOI: doi.org/10.7860/JCDR/2018/31216.11174.
58. Chan, P. J.; Nurul, Z. Z.; Chuah, J. S.; Nabil, M. M. A.; Isa, N. M.; Sabarul, A. M.; Nazrun, A. S. Association between Risk Factors of Osteoporosis and Bone Mineral Density in Women of Different Ethnic Groups in a Malaysian Hospital. *International Journal of Osteoporosis and Metabolic Disorders* **2014**, *7* (1), 1–11. DOI: doi.org/10.3923/IJOM.2014.1.11.
59. Wang, S.; Lin, S.; Zhou, Y.; Wang, Z. Social and Behavior Factors Related to Aged Chinese Women with Osteoporosis. <http://dx.doi.org/10.1080/09513590802309196> **2009**, *24* (10), 538–545. DOI: doi.org/10.1080/09513590802309196.
60. Wang, Y.; Ding, H.; Wang, X.; Wei, Z.; Feng, S. Associated Factors for Osteoporosis and Fracture in Chinese Elderly. *Med Sci Monit* **2019**, *25*, 5580–5588. DOI: doi.org/10.12659/MSM.914182.
61. Palomeras-Vilches, A.; Viñals-Mayolas, E.; Bou-Mias, C.; Jordà-Castro, M.; Agüero-Martínez, M.; Busquets-Barceló, M.; Pujol-Busquets, G.; Carrion, C.; Bosque-Prous, M.; Serra-Majem, L.; Bach-Faig, A. Adherence to the Mediterranean Diet and Bone Fracture Risk in Middle-Aged Women: A Case Control Study. *Nutrients* **2019**, *11* (10). DOI: doi.org/10.3390/NU11102508.
62. Alquaiz, A. M.; Kazi, A.; Tayel, S.; Shaikh, S. A.; Al-Sharif, A.; Othman, S.; Habib, F.; Fouda, M.; Sulaimani, R. Prevalence and Factors Associated with Low Bone Mineral Density in Saudi Women: A Community Based Survey. *BMC Musculoskelet Disord* **2014**, *15* (1). DOI: doi.org/10.1186/1471-2474-15-5.
63. Romero, A. A.; Duarte-Gardea, M.; Ortiz, M.; Labrado, C.; Noe, M. Bone Mineral Density and Body Mass Index of Mexican American Women. *Hispanic Healthcare International* **2005**, *3* (1), 9–14.
64. Grzegorzewska, A. E.; Mlot-Michalska, M. Coffee Consumption and Bone Mineral Density in Dialysis Patients. *Advances in Peritoneal Dialysis* **2008**, *24*.
65. Muraki, S.; Yamamoto, S.; Ishibashi, H.; Oka, H.; Yoshimura, N.; Kawaguchi, H.; Nakamura, K. Diet and Lifestyle Associated with Increased Bone Mineral Density: Cross-Sectional Study of Japanese Elderly Women at an Osteoporosis Outpatient Clinic. *Journal of Orthopaedic Science* **2007**, *12* (4), 317–320. DOI: doi.org/10.1007/S00776-007-1143-0.
66. Hossein-Nezhad, A.; Maghbooli, Z.; Shafaei, A. R.; Javadi, E.; Larijani, B. Relationship between Tea Drinking and Bone Mineral Density in Iranian Population. *Iran J Public Health* **2007**, *36* (Supple 1), 57–62.
67. Barrett Connor, E.; Chang, J. C.; Edelstein, S. L. Coffee-Associated Osteoporosis Offset by Daily Milk Consumption: The Rancho Bernardo Study. *JAMA* **1994**, *271* (4), 280–283. DOI: doi.org/10.1001/JAMA.1994.03510280042030.

68. Fujiwara, S.; Kasagi, F.; Yamada, M.; Kodama, K. Risk Factors for Hip Fracture in a Japanese Cohort. *undefined* **1997**, *12* (7), 998–1004. DOI: doi.org/10.1359/JBMR.1997.12.7.998.
69. Cummings, S. R.; Nevitt, M. C.; Browner, W. S.; Stone, K.; Fox, K. M.; Ensrud, K. E.; Cauley, J.; Black, D.; Vogt, T. M. Risk Factors for Hip Fracture in White Women. Study of Osteoporotic Fractures Research Group. *N Engl J Med* **1995**, *332* (12), 767–773. DOI: doi.org/10.1056/NEJM199503233321202.
70. Albrand, G.; Munoz, F.; Sornay-Rendu, E.; DuBoeuf, F.; Delmas, P. D. Independent Predictors of All Osteoporosis-Related Fractures in Healthy Postmenopausal Women: The OFELY Study. *Bone* **2003**, *32* (1), 78–85. DOI: doi.org/10.1016/S8756-3282(02)00919-5.
71. Huopio, J.; Kröger, H.; Honkanen, R.; Saarikoski, S.; Alhava, E. Risk Factors for Perimenopausal Fractures: A Prospective Study. *Osteoporosis International* **2000** *11*:3 **2000**, *11* (3), 219–227. DOI: doi.org/10.1007/S001980050284.
72. Ramalho, A. C.; Lazaretti-Castro, M.; Hauache, O.; Vieira, J. G.; Takata, E.; Cafalli, F.; Tavares, F. Osteoporotic Fractures of Proximal Femur: Clinical and Epidemiological Features in a Population of the City of São Paulo. *Sao Paulo Med J* **2001**, *119* (2), 48–53. DOI: doi.org/10.1590/S1516-31802001000200002.
73. Kiel, D. P.; Felson, D. T.; Hannan, M. T.; Anderson, J. J.; F Wilson, P. W.; Felson, T.; Hannan, M. T.; Anderson, J. J.; F Wilson, P. W. CAFFEINE AND THE RISK OF HIP FRACTURE: THE FRAMINGHAM STUDY. *Am J Epidemiol* **1990**, *132* (4), 675–684. DOI: doi.org/10.1093/OXFORDJOURNALS.AJE.A115709.
74. Li, J. Y.; Ge, J. R.; Chen, J.; Ye, Y. J.; Xie, L. H.; Li, L.; Chai, H. Clinical Study on the Influence of Tea Drinking Habits on Bone Mineral Density and Osteoporosis in Postmenopausal Women in Fuzhou City, China. *Progress in Nutrition* **2021**, *23* (1), e2021033–e2021033. DOI: doi.org/10.23751/PN.V23I1.9409.
75. Tavani, A.; Negri, E.; Vecchia, C. La. Coffee Intake and Risk of Hip Fracture in Women in Northern Italy. *Prev Med (Baltim)* **1995**, *24* (4), 396–400. DOI: doi.org/10.1006/pmed.1995.1064.
76. Ma, C. C.; Burchfiel, C. M.; Grove, J.; Fekedulegn, D.; Lu, Y.; Andrew, M. E.; Willcox, B.; Masaki, K. H.; Curb, J. D.; Rodriguez, B. L. Risk Factors for Fractures among Japanese-American Men: The Honolulu Heart Program and Honolulu-Asia Aging Study. *Arch Osteoporos* **2011**, *6* (1–2), 197. DOI: doi.org/10.1007/S11657-011-0068-6.
77. Jha, R. M.; Mithal, A.; Malhotra, N.; Brown, E. M. Pilot Case-Control Investigation of Risk Factors for Hip Fractures in the Urban Indian Population. *BMC Musculoskeletal Disord* **2010**, *11* (1), 1–10. DOI: doi.org/10.1186/1471-2474-11-49/TABLES/3.

78. Kreiger, N.; Gross, A.; Hunter, G. Dietary Factors and Fracture in Postmenopausal Women: A Case-Control Study. *Int J Epidemiol* **1992**, *21* (5), 953–958. DOI: doi.org/10.1093/IJE/21.5.953.
79. Suzuki, T.; Yoshida, H.; Hashimoto, T.; Yoshimura, N.; Fujiwara, S.; Fukunaga, M.; Nakamura, T.; Yoh, K.; Inoue, T.; Hosoi, T.; Orimo, H. Case-Control Study of Risk Factors for Hip Fractures in the Japanese Elderly by a Mediterranean Osteoporosis Study (MEDOS) Questionnaire. *Bone* **1997**, *21* (5), 461–467. DOI: doi.org/10.1016/S8756-3282(97)00179-8.
80. Johnell, O.; Gullberg, B.; Kanis, J. A.; Allander, E.; Elffors, L.; Dequeker, J.; Dilsen, G.; Gennari, C.; Vaz, L. A.; Lyritis, G.; Mazzuoli, G.; Miravet, L.; Passeri, M.; Cano, P. R.; Rapado, A.; Ribot, C. Risk Factors for Hip Fracture in European Women: The MEDOS Study. *Journal of Bone and Mineral Research* **1995**, *10* (11), 1802–1815. DOI: doi.org/10.1002/JBMR.5650101125.
81. Kanis, J.; Johnell, O.; Gullberg, B.; Allander, E.; Elffors, L.; Ranstam, J.; Dequeker, J.; Dilsen, G.; Gennari, C.; Lopes Vaz, A.; Lyritis, G.; Mazzuoli, G.; Miravet, L.; Passeri, M.; Perez Cano, R.; Rapado, A.; Ribot, C. Risk Factors for Hip Fracture in Men from Southern Europe: The MEDOS Study. *Osteoporosis International* **1999**, *9* (1), 45–54. DOI: doi.org/10.1007/S001980050115.
82. Ng, T. P.; Aung, K. C. Y.; Feng, L.; Feng, L.; Nyunt, M. S. Z.; Yap, K. B. Tea Consumption and Physical Function in Older Adults: A Cross-Sectional Study. *The journal of nutrition, health & aging* **2013**, *18* (2), 161–166. DOI: doi.org/10.1007/S12603-013-0354-7.
83. Cumming, R. G.; Klineberg, R. J. Case-Control Study of Risk Factors for Hip Fractures in the Elderly. *Am J Epidemiol* **1994**, *139* (5), 493–503. DOI: doi.org/10.1093/OXFORDJOURNALS.AJE.A117032.
84. Nieves, J. W.; Grisso, J. A.; Kelsey, J. L. A Case-Control Study of Hip Fracture: Evaluation of Selected Dietary Variables and Teenage Physical Activity. *Osteoporos Int* **1992**, *2* (3), 122–127. DOI: doi.org/10.1007/BF01623818.
85. Jokinen, H.; Pulkkinen, P.; Korpelainen, J.; Heikkinen, J.; Keinänen-Kiukaanniemi, S.; Jämsä, T.; Korpelainen, R. Risk Factors for Cervical and Trochanteric Hip Fractures in Elderly Women: A Population-Based 10-Year Follow-up Study. *Calcif Tissue Int* **2010**, *87* (1), 44–51. DOI: doi.org/10.1007/S00223-010-9382-Z/TABLES/3.
86. van Geel, A. C. M.; Geusens, P. P.; Nagtzaam, I. F.; Schreurs, C. M. J. R.; van der Voort, D. J. M.; Rinkens, P. E. L. M.; Kester, A. D. M.; Dinant, G. J. Timing and Risk Factors for Clinical Fractures among Postmenopausal Women: A 5-Year Prospective Study. *BMC Med* **2006**, *4*, 24. DOI: doi.org/10.1186/1741-7015-4-24.
87. Hallström, H.; Wolk, A.; Glynn, A.; Michaëlsson, K. Coffee, Tea and Caffeine Consumption in Relation to Osteoporotic Fracture Risk in a Cohort of Swedish Women. *Osteoporosis International* **2006**, *17* (7), 1055–1064. DOI: doi.org/10.1007/S00198-006-0109-Y/FIGURES/1.

88. Hansen, S. A.; Folsom, A. R.; Kushi, L. H.; Sellers, T. A. Association of Fractures with Caffeine and Alcohol in Postmenopausal Women: The Iowa Women's Health Study. *Public Health Nutr* **2000**, 3 (3), 253–261. DOI: doi.org/10.1017/S136898000000029X.
89. Trimpou, P.; Odén, A.; Simonsson, T.; Wilhelmsen, L.; Landin-Wilhelmsen, K. High Serum Total Cholesterol Is a Long-Term Cause of Osteoporotic Fracture. *Osteoporos Int* **2011**, 22 (5), 1615–1620. DOI: doi.org/10.1007/S00198-010-1367-2.
90. Chau, Y. P.; Au, P. C. M.; Li, G. H. Y.; Sing, C. W.; Cheng, V. K. F.; Tan, K. C. B.; Kung, A. W. C.; Cheung, C. L. Serum Metabolome of Coffee Consumption and Its Association With Bone Mineral Density: The Hong Kong Osteoporosis Study. *J Clin Endocrinol Metab* **2020**, 105 (3), e619–e627. DOI: doi.org/10.1210/CLINEM/DGZ210.
91. Määttä, M.; Terho, E.; Jokinen, H.; Pulkkinen, P.; Korpelainen, J.; Heikkinen, J.; Keinänen-Kiukaanniemi, S.; Jämsä, T.; Korpelainen, R. Lifestyle Factors and Site-Specific Risk of Hip Fracture in Community Dwelling Older Women – a 13-Year Prospective Population-Based Cohort Study. *BMC Musculoskelet Disord* **2012**, 13, 173. DOI: doi.org/10.1186/1471-2474-13-173.
